# Supplementary material
Source: publisher site journal article supplement (https://www.spandidos-publications.com/6963/downloadSupplementary)
Supplement: Supplementary file 1 [file downloadSupplementary]

## Sheet: Sheet1
Table SIII. Up-regulated genes 24 h after LIPUS (low-intensity pulsed ultrasound) exposure.
Gene symbol	Fold-change	p value	TPM (Transcripts per million reads)						Gene title
			Ctr-1	Ctr-2	Ctr-3	LIPUS-1	LIPUS-2	LIPUS-3
HTD2	2.84	0.049	0.472	1.237	0.454	4.782	4.406	1.347	hydroxyacyl-thioester dehydratase type 2(HTD2)
PTGS2	2.69	0.047	36.78	54.133	49.009	76.367	257.445	96.762	prostaglandin-endoperoxide synthase 2(PTGS2)
IER3	2.57	0.015	17.924	28.377	29.123	41.625	83.682	72.239	immediate early response 3(IER3)
DGKI	2.51	0.004	1.675	1.544	2.592	4.317	4.48	5.469	diacylglycerol kinase, iota(Dgki)
FJX1	2.37	0.035	2.292	3.05	3.298	4.222	11.432	6.367	four-jointed box kinase 1(fjx1)
KYNU	2.37	0.002	0.31	0.748	0	2.348	3.036	1.865	kynureninase(Kynu)
ALAS2	2.29	0.03	1.889	0.983	1.309	4.416	3.183	2.1	aminolevulinate, delta-, synthase 2(alas2)
PTPMT1	2.19	0.034	2.684	5.407	3.034	7.445	10.653	5.834	protein tyrosine phosphatase mitochondrial 1(PTPMT1)
GZMB	2.17	0.008	0.521	0.892	0	1.865	1.753	3.124	granzyme B(Gzmb)
CHST6	2.15	0.049	1.409	1.732	2.337	3.103	2.796	6.556	carbohydrate sulfotransferase 6(CHST6)
DEPDC1B	2.12	0.025	4.704	6.227	3.857	8.517	15.241	8.306	DEP domain containing 1B(DEPDC1B)
HACD3	2	0.046	3.99	1.933	3.007	6.805	4.064	6.678	3-hydroxyacyl-CoA dehydratase 3(hacd3)
TMEM240	1.94	0.034	3.732	5.556	4.428	8.532	12.565	6.208	transmembrane protein 240(TMEM240)
TSEN34	1.9	0.019	2.042	2.369	1.528	4.416	4.115	2.795	tRNA splicing endonuclease subunit 34(TSEN34)
TGM1	1.9	0.036	10.51	13.58	8.863	15.02	29.268	19.635	transglutaminase 1(TGM1)
GUCA1A	1.89	0.037	1.831	0.992	1.779	2.442	3.58	2.515	Guanylyl cyclase-activating protein 1(GUCA1A)
LOC106578582	1.89	0.012	0.81	0.989	0.663	2.591	1.767	1.471	LYR motif-containing protein 4B-like(LOC106578582)
BORA	1.89	0.001	2.467	2.138	1.942	3.763	4.339	4.206	bora aurora kinase A activator(bora)
RAD51C	1.88	0.005	2.078	1.515	1.443	3.25	2.77	3.369	RAD51 paralog C(RAD51C)
HGFAC	1.86	0.003	1.257	1.327	1.515	2.103	2.559	3.005	HGF activator(HGFAC)
PTRH1	1.85	0.003	2.557	3.334	2.944	5.599	6.101	4.637	peptidyl-tRNA hydrolase 1 homolog(PTRH1)
LIPG	1.84	0.002	37.718	40.88	40.774	66.155	89.032	66.89	lipase G, endothelial type(LIPG)
P2RX5	1.84	0.038	1.504	0.72	0.709	1.74	1.785	2.992	purinergic receptor P2X 5(P2rx5)
TG	1.83	0.036	1.438	1.187	1.404	2.32	1.763	3.617	thyroglobulin(TG)
FGF18	1.83	0.013	1.452	1.376	1.579	1.957	3.194	3.07	fibroblast growth factor 18(FGF18)
GFM2	1.82	0.041	8.897	13.089	7.896	24.774	15.361	14.657	GTP dependent ribosome recycling factor mitochondrial 2(gfm2)
DNAJB6.S	1.81	0.003	11.45	12.994	13.916	19.058	26.301	24.438	DnaJ heat shock protein family (Hsp40) member B6 S homeolog(dnajb6.S)
PPP1R35	1.8	0.008	1.911	1.989	2.48	3.024	4.289	4.217	protein phosphatase 1, regulatory subunit 35(ppp1r35)
LRRC42	1.79	0.027	1.535	1.745	1.273	2.779	3.535	1.975	leucine rich repeat containing 42(lrrc42)
HPF1	1.77	0.004	9.209	9.855	7.38	16.829	16.457	13.435	histone PARylation factor 1(hpf1)
TBL3	1.76	0.048	20.982	41.739	31.404	55.477	61.515	43.743	transducin beta like 3(TBL3)
MLF1	1.76	0.004	2.006	1.921	1.773	3.063	4.102	2.94	myeloid leukemia factor 1(MLF1)
TRPM5	1.75	0.039	2.306	3.212	3.467	4.661	4.155	7.154	transient receptor potential cation channel, subfamily M, member 5(Trpm5)
LYRM1	1.74	0.005	3.678	5.174	4.114	8.098	7.539	6.729	LYR motif containing 1(lyrm1)
HSD17B12A	1.73	0.034	39.399	49.149	44.384	63.092	109.521	63.953	hydroxysteroid (17-beta) dehydrogenase 12a(hsd17b12a)
OVCA2	1.71	0.007	1.765	2.126	1.886	3.993	3.279	2.714	OVCA2 serine hydrolase domain containing(ovca2)
BOP1	1.7	0.01	18.609	22.381	28.843	41.378	37.157	38.441	BOP1 ribosomal biogenesis factor(bop1)
CP	1.7	0.01	4.459	5.339	5.15	6.633	9.674	9.383	ceruloplasmin(CP)
ARL2BP	1.7	0.046	1.071	1.098	1.084	2.777	1.537	1.458	ADP-ribosylation factor-like 2 binding protein(arl2bp)
ZNF185	1.68	0.049	30.453	37.702	33.059	55.549	80.352	40.471	zinc finger protein 185 with LIM domain(ZNF185)
MID1IP1A	1.68	0.032	33.842	29.005	23.492	53.07	57.439	35.798	MID1 interacting protein 1a(mid1ip1a)
SLC5A10	1.67	0.033	8.099	8.826	6.73	12.385	17.72	10.228	solute carrier family 5 member 10(SLC5A10)
EXOSC6	1.67	0.045	5.516	9.753	8.561	12.417	15.48	11.102	exosome component 6(exosc6)
UGT1-6	1.66	0.03	0.966	1.282	1.293	1.518	1.96	2.558	UDP-glucuronosyltransferase 1-6(UGT1-6)
TSPAN13	1.66	0.041	2.514	2.386	1.534	4.323	3.15	3.099	tetraspanin 13(TSPAN13)
CYYR1	1.66	0.02	2.481	3.849	3.851	5.035	5.943	5.627	cysteine/tyrosine-rich 1(cyyr1)
TOMM34	1.66	0.003	14.596	14.098	12.66	22.05	26.718	20.24	translocase of outer mitochondrial membrane 34(TOMM34)
GK3P	1.66	0.011	1.13	1.543	1.086	2.296	2.058	1.826	glycerol kinase 3 pseudogene(GK3P)
AP1S3	1.65	0.002	14.743	12.65	12.327	24.065	21.807	19.688	adaptor-related protein complex AP-1, sigma 3(Ap1s3)
ELOVL7	1.65	0.037	20.257	25.043	19.221	26.78	46.892	34.593	ELOVL fatty acid elongase 7(ELOVL7)
CDK2AP1	1.63	0.015	7.845	9.998	10.024	13.195	18.73	13.828	cyclin dependent kinase 2 associated protein 1(CDK2AP1)
SETD6	1.63	0.037	3.141	3.829	3.503	5.476	7.706	4.318	SET domain containing 6, protein lysine methyltransferase(setd6)
AACS	1.63	0.005	5.583	5.87	4.438	8.254	9.484	7.991	acetoacetyl-CoA synthetase(aacs)
CASP9	1.63	0.001	14.483	14.588	12.696	22.399	21.757	23.675	caspase 9(CASP9)
MORN4	1.62	0.012	1.393	1.181	0.951	1.642	2.173	1.975	MORN repeat containing 4(MORN4)
AURKA.S	1.61	0.001	2.61	2.563	2.153	4.123	3.683	3.97	aurora kinase A S homeolog(aurka.S)
FIBCD1	1.61	0.023	0.697	0.846	0.398	2.113	1.567	1.261	fibrinogen C domain containing 1(fibcd1)
ARL11	1.61	0.032	1.012	1.038	1.448	1.86	1.502	2.266	ADP-ribosylation factor-like 11(Arl11)
NAB2	1.6	0.039	2.991	4.087	4.715	5.207	7.563	5.978	NGFI-A binding protein 2(NAB2)
GPRC5C	1.6	0.037	13.994	16.699	14.669	20.493	33.331	20.468	G protein-coupled receptor, family C, group 5, member C(Gprc5c)
SULT6B1	1.59	0.005	24.565	29.154	31.477	44.136	40.818	50.127	sulfotransferase family, cytosolic, 6b, member 1(sult6b1)
ATAD3A	1.58	0.047	24.264	33.236	25.865	42.046	57.439	34.116	ATPase family, AAA domain containing 3A(atad3a)
ICE2	1.58	0.031	4.803	6.975	5.484	8.945	7.396	10.96	interactor of little elongation complex ELL subunit 2(Ice2)
DOK1	1.57	0.033	10.907	16.076	13.683	17.015	24.743	22.094	docking protein 1(Dok1)
KLHL7	1.56	0.021	2.875	3.19	3.448	6.338	4.2	4.548	kelch-like family member 7(Klhl7)
PPL	1.55	0.045	54.213	62.839	41.485	80.399	98.861	65.936	periplakin(PPL)
GRHL3	1.54	0.027	16.013	20.917	13.353	23.518	28.666	24.425	grainyhead like transcription factor 3(Grhl3)
ZGC:101851	1.54	0.029	13.571	12.98	9.439	17.678	21.713	15.886	zgc:101851(zgc:101851)
PCSK9	1.54	0.021	8.986	9.28	7.546	14.618	14.968	10.482	proprotein convertase subtilisin/kexin type 9(PCSK9)
FBL	1.53	0.04	119.603	163.471	148.678	192.613	284.33	191.694	fibrillarin(FBL)
CDH3	1.53	0.042	117.035	141.368	147.939	160.572	264.48	206.452	cadherin 3(CDH3)
NUFIP1	1.53	0.012	5.286	5.225	5.403	8.366	9.678	6.593	nuclear FMR1 interacting protein 1(NUFIP1)
METTL1	1.52	0.04	9.423	10.433	8.256	13.282	18.671	11.595	methyltransferase 1, tRNA methylguanosine(mettl1)
PRSS30	1.51	0.001	3.43	3.187	3.617	4.807	5.535	5.155	protease, serine, 30(Prss30)
HOXA9B	1.51	0.04	2.459	3.066	2.195	3.552	4.873	3.307	homeobox A9b(hoxa9b)
MED21	1.51	0.043	8.82	8.011	6.074	10.862	14.091	9.691	mediator complex subunit 21(med21)
TAF15	1.51	0.007	28.586	37.607	31.41	48.584	53.405	44.917	TATA-box binding protein associated factor 15(TAF15)
TMEM138	1.5	0.037	1.755	1.331	1.336	1.752	2.588	2.341	transmembrane protein 138(tmem138)
TMEM256	1.5	0.023	21.284	29.216	30.354	37.187	45.156	38.044	transmembrane protein 256(tmem256)
RHOF	1.5	0.01	32.795	35.736	34.907	44.699	62.424	49.452	ras homolog family member F, filopodia associated(RHOF)
MMAA	1.5	0.001	5.13	5.095	5.319	7.885	8.539	6.95	metabolism of cobalamin associated A(MMAA)
ACY1	1.5	0.002	0.869	0.491	1.032	1.44	1.404	1.716	aminoacylase 1(Acy1)
CYSLTR1	1.5	0.036	6.264	9.361	6.109	9.758	11.458	10.755	cysteinyl leukotriene receptor 1(Cysltr1)
TMEM17	1.49	0.031	3.1	3.083	2.091	3.883	3.866	4.444	transmembrane protein 17(tmem17)
CHRD	1.49	0.015	7.969	6.884	8.158	13.067	11.959	9.434	chordin(chrd)
CEP55L	1.49	0.027	2.934	4.046	4.422	5.94	5.61	5.18	centrosomal protein 55 like(cep55l)
NBL1	1.49	0.03	15.738	18.28	13.701	24.183	27.731	19.274	NBL1, DAN family BMP antagonist(nbl1)
PLAAT1	1.49	0.048	7.599	7.447	7.791	12.015	14.275	8.421	phospholipase A and acyltransferase 1(Plaat1)
ADO	1.48	0.021	6.843	8.48	5.639	10.689	10.284	9.707	2-aminoethanethiol (cysteamine) dioxygenase(Ado)
YDJC	1.48	0.016	7.996	8.822	7.025	10.479	13.961	11.008	YdjC chitooligosaccharide deacetylase homolog(ydjc)
ARL4A	1.48	0.022	18.486	17.754	15.2	22.986	31.263	22.548	ADP-ribosylation factor like GTPase 4A(Arl4a)
NOA1A	1.48	0.028	1.911	1.508	1.961	2.396	3.227	2.371	nitric oxide associated 1 A(NOA1A)
SELENOI	1.47	0.032	11.09	15.726	12.35	17.18	22.447	17.66	selenoprotein I(SELENOI)
HECW1	1.47	0.035	1.435	1.685	1.585	2.137	1.923	2.948	HECT, C2 and WW domain containing E3 ubiquitin protein ligase 1(HECW1)
CDYL	1.46	0.014	5.329	5.025	4.518	6.156	8.481	7.275	chromodomain Y-like(Cdyl)
VWA7	1.46	0.019	11.87	14.368	10.907	15.77	20.747	17.793	von Willebrand factor A domain containing 7(VWA7)
SLX9	1.46	0.042	4.019	4.665	4.761	6.846	7.986	5.08	SLX9 ribosome biogenesis factor(SLX9)
NANP	1.45	0.044	3.205	3.912	3.442	5.308	6.239	3.993	N-acetylneuraminic acid phosphatase(Nanp)
TIMM17A	1.45	0.026	30.617	41.921	37.122	49.831	61.367	47.475	translocase of inner mitochondrial membrane 17A(TIMM17A)
SOSTDC1	1.45	0.016	8.913	7.631	7.181	10.385	13.463	10.603	sclerostin domain containing 1(Sostdc1)
GFM1	1.45	0.012	11.395	12.982	9.329	16.092	16.335	15.898	G elongation factor, mitochondrial 1(gfm1)
KIAA1143.S	1.44	0.012	7.487	6.516	6.244	8.377	11.016	9.926	KIAA1143 S homeolog(kiaa1143.S)
EXOSC3	1.44	0.042	15.85	14.077	11.282	17.791	23.8	17.854	exosome component 3(EXOSC3)
HOXC11A	1.44	0.034	1.272	0.568	0.751	1.388	1.913	1.436	homeobox C11a(hoxc11a)
ANKMY1	1.44	0.048	3.105	2.727	2.409	4.645	4.264	3.086	ankyrin repeat and MYND domain containing 1(Ankmy1)
ZDHHC21	1.44	0.011	1.987	2.093	2.209	2.815	2.716	3.597	zinc finger DHHC-type palmitoyltransferase 21(zdhhc21)
REXO5	1.44	0.022	6.781	5.734	5.309	9.246	7.159	9.329	RNA exonuclease 5(REXO5)
TDP1	1.44	0.001	0.682	1.112	0.74	1.504	1.504	1.468	tyrosyl-DNA phosphodiesterase 1(Tdp1)
FDFT1	1.43	0.007	12.654	9.697	11.909	16.274	16.581	15.982	farnesyl diphosphate farnesyl transferase 1(Fdft1)
EVPL	1.43	0.043	127.258	141.338	90.922	169.504	178.75	158.612	envoplakin(EVPL)
GOLPH3L	1.43	0.035	4.663	7.061	6.417	8.733	8.776	8.096	golgi phosphoprotein 3-like(golph3l)
ZBTB6	1.43	0.005	0	0.682	1.129	1.621	1.323	1.538	zinc finger and BTB domain containing 6(Zbtb6)
SCN3B	1.43	0.01	0.94	1.039	0.963	1.708	1.403	1.263	sodium voltage-gated channel beta subunit 3(SCN3B)
PITPNA	1.43	0.02	62.022	58.217	47.556	91.091	76.267	71.865	phosphatidylinositol transfer protein, alpha(Pitpna)
VMP1	1.43	0.029	15.692	18.763	16.554	20.469	29.588	23.387	vacuole membrane protein 1(VMP1)
TOMM40	1.43	0.015	45.382	47.013	36.825	66.629	63.368	54.049	translocase of outer mitochondrial membrane 40 homolog(tomm40)
YTHDC2	1.43	0.019	9.377	10.379	10.526	13.649	12.5	17.375	YTH domain containing 2(Ythdc2)
GTF2A2	1.42	0.013	14.568	14.771	13.329	18.948	24.129	18.153	transcription initiation factor IIA subunit 2(gtf2a2)
DNAJC15	1.42	0.008	6.536	5.838	5.354	7.648	9.397	8.21	DnaJ heat shock protein family (Hsp40) member C15(DNAJC15)
MRPS9	1.42	0.036	23.257	23.387	17.8	32.245	34.051	25.445	mitochondrial ribosomal protein S9(MRPS9)
JMJD4	1.42	0.01	0.628	0.828	0.482	1.349	1.69	1.26	jumonji domain containing 4(jmjd4)
POLR3F	1.42	0.015	8.193	9.207	7.66	11.691	13.651	10.346	RNA polymerase III subunit F(POLR3F)
TRIAP1	1.42	0.016	4.883	3.852	3.79	5.277	6.13	6.277	TP53 regulated inhibitor of apoptosis 1(TRIAP1)
EXOSC2	1.42	0.005	21.879	24.174	20.055	30.258	34.241	29.114	exosome component 2(EXOSC2)
SLC35F1	1.41	0.002	2.883	2.433	2.565	3.922	3.594	3.613	solute carrier family 35 member F1(slc35f1)
ARPC5L	1.4	0.044	16.267	17.678	17.761	23.301	30.438	19.756	actin related protein 2/3 complex subunit 5 like(ARPC5L)
CDKN1A	1.4	0.012	9.828	8.982	10.494	11.923	13.739	15.482	cyclin dependent kinase inhibitor 1A(CDKN1A)
MRPL15	1.4	0.002	11.615	14.12	13.092	18.121	17.705	18.29	mitochondrial ribosomal protein L15(mrpl15)
PMPCB	1.4	0.013	10.187	12.479	11.813	15.045	18.251	14.939	peptidase, mitochondrial processing subunit beta(PMPCB)
BIN2	1.39	0.037	18.478	21.558	21.256	26.021	35.328	24.91	bridging integrator 2(Bin2)
MARS2	1.39	0.049	4.591	3.968	4.228	5.892	7.363	4.781	methionyl-tRNA synthetase 2, mitochondrial(mars2)
TMED5	1.39	0.023	9.311	12.126	9.093	13.213	15.413	13.54	transmembrane p24 trafficking protein 5(TMED5)
GFPT2	1.39	0.011	89.71	115.561	97.936	128.898	142.664	147.892	glutamine-fructose-6-phosphate transaminase 2(GFPT2)
RAB25	1.39	0.005	32.919	33.658	32.868	42.55	52.476	43.639	RAB25, member RAS oncogene family(RAB25)
MRPL43	1.39	0.02	8.977	8.491	7.861	12.433	13.175	9.777	mitochondrial ribosomal protein L43(MRPL43)
CRYAB	1.39	0.05	1.371	1.704	1.788	2.342	1.838	2.592	Alpha-crystallin B chain(CRYAB)
FASTKD2	1.39	0.029	10.111	8.417	9.589	14.396	14.06	10.718	FAST kinase domains 2(Fastkd2)
NDUFAF2	1.38	0.024	1.044	1.379	1.022	1.664	1.469	1.593	NADH:ubiquinone oxidoreductase complex assembly factor 2(Ndufaf2)
GOLT1B	1.38	0.006	15.475	14.439	16.733	22.689	22.778	19.127	golgi transport 1B(Golt1b)
URB2	1.38	0.042	2.782	3.859	3.531	4.293	5.383	4.335	URB2 ribosome biogenesis homolog(URB2)
WBP4	1.38	0.028	10.713	11.302	8.508	15.332	14.367	12.352	WW domain binding protein 4(WBP4)
COA1	1.38	0.045	2.056	2.071	1.924	2.38	3.553	2.56	cytochrome c oxidase assembly factor 1(COA1)
RCL1	1.38	0.032	12.685	14.12	13.733	18.464	22.597	15.567	RNA terminal phosphate cyclase-like 1(Rcl1)
OAZ1A	1.38	0.049	189.669	204.387	193.758	248.184	346.115	229.192	ornithine decarboxylase antizyme 1a(oaz1a)
ALYREF	1.38	0.004	199.85	226.074	222.916	279.611	326.441	287.426	Aly/REF export factor(Alyref)
PDF	1.38	0.026	2.207	1.812	1.896	3.204	2.478	2.482	peptide deformylase, mitochondrial(PDF)
ENTPD6	1.37	0.026	4.833	4.017	3.719	5.479	6.55	5.225	ectonucleoside triphosphate diphosphohydrolase 6(ENTPD6)
PSMC3	1.37	0.042	89.503	100.272	77.436	120.736	143.956	103.826	proteasome 26S subunit, ATPase 3(Psmc3)
RCC1L	1.37	0.037	2.934	3.407	3.393	4.421	5.342	3.726	RCC1 like(RCC1L)
PSMD14	1.37	0.017	41.479	41.885	36.826	57.751	61.313	46.847	proteasome (prosome, macropain) 26S subunit, non-ATPase, 14(Psmd14)
HIP1R	1.37	0.018	13.111	15.56	11.722	18.518	16.988	19.682	huntingtin interacting protein 1 related(HIP1R)
MRPL40	1.37	0.039	9.581	9.877	8.686	13.078	15.437	10.534	mitochondrial ribosomal protein L40(Mrpl40)
NUP35	1.37	0.019	8.613	10.486	11.487	14.773	14.081	12.899	nucleoporin 35(nup35)
INO80C	1.37	0.017	6.865	8.892	8.733	10.33	11.419	11.668	INO80 complex subunit C(Ino80c)
SNU13.S	1.37	0.036	72.467	79.84	69.775	98.494	123.288	85.609	small nuclear ribonucleoprotein 13 S homeolog(snu13.S)
ZNF552	1.37	0.019	2.998	3.055	2.309	3.62	3.887	3.857	zinc finger protein 552(ZNF552)
HYPK	1.37	0.025	10.482	10.436	9.199	14.754	15.292	11.445	huntingtin interacting protein K(Hypk)
MPZL3.L	1.37	0.002	31.045	33.021	31.728	39.954	46.584	44.56	myelin protein zero like 3 L homeolog(mpzl3.L)
DNAJC24	1.36	0.04	2.956	4.095	3.266	4.316	5.273	4.411	DnaJ heat shock protein family (Hsp40) member C24(DNAJC24)
GALE	1.36	0.03	25.321	25.493	22.513	34.776	38.349	27.624	UDP-galactose-4-epimerase(GALE)
B3GNTL1	1.36	0.009	0.956	1.094	0.862	1.225	1.499	1.508	UDP-GlcNAc:betaGal beta-1,3-N-acetylglucosaminyltransferase-like 1(B3gntl1)
SPG11	1.36	0.036	4.394	4.814	3.64	5.159	6.672	5.652	SPG11, spatacsin vesicle trafficking associated(Spg11)
RRP15	1.36	0.043	27.428	24.919	25.394	30.855	44.224	32.135	ribosomal RNA processing 15 homolog(rrp15)
CCDC18	1.36	0.035	1.101	1.355	1.013	1.588	1.741	1.378	coiled-coil domain containing 18(CCDC18)
GATD3	1.36	0.032	123.39	113.268	141.383	148.063	169.251	198.63	glutamine amidotransferase class 1 domain containing 3(gatd3)
BUD23	1.36	0.046	16.985	21.551	14.444	25.027	23.482	22.612	BUD23, rRNA methyltransferase and ribosome maturation factor(Bud23)
CYP2D15	1.36	0.006	23.245	27.945	23.976	32.879	36.418	32.614	cytochrome P450 2D(CYP2D15)
BOLA1	1.36	0.048	5.608	4.618	3.96	7.21	5.775	6.145	bolA-like 1 (E. coli)(Bola1)
PHAX	1.35	0.033	6.217	5.476	7.086	7.894	9.801	7.725	phosphorylated adaptor for RNA export(PHAX)
WDR83OS	1.35	0.048	63.186	76.225	58.859	94.997	98.96	74.254	WD repeat domain 83 opposite strand(Wdr83os)
SPAG1A	1.35	0.001	20.752	22.341	21.699	27.751	30.068	29.684	sperm associated antigen 1a(spag1a)
PLEKHG6	1.35	0.024	2.374	2.813	2.303	2.915	3.686	3.517	pleckstrin homology and RhoGEF domain containing G6(PLEKHG6)
NVL	1.35	0.044	12.17	14.883	17.88	20.728	18.779	20.438	nuclear VCP like(NVL)
ADGRG3	1.35	0.041	6.127	4.354	5.721	7.075	6.773	7.822	adhesion G protein-coupled receptor G3(ADGRG3)
NDUFB2	1.35	0.01	42.643	49.11	42.483	65.903	61.04	54.09	NADH:ubiquinone oxidoreductase subunit B2(NDUFB2)
RNPS1	1.35	0.019	75.48	91.68	75.766	106.937	121.454	98.471	RNA binding protein S1, serine-rich domain(rnps1)
CDIP1	1.35	0.033	22.722	19.448	17.595	29.411	27.843	23.145	cell death-inducing p53 target 1(cdip1)
NSUN2	1.35	0.008	12.774	11.769	10.858	15.963	17.281	14.407	NOP2/Sun RNA methyltransferase 2(NSUN2)
NUP54	1.34	0.002	14.257	14.778	13.889	20.514	19.486	17.774	nucleoporin 54(Nup54)
RBM45	1.34	0.011	20.132	18.147	17.063	25.092	27.085	22.241	RNA binding motif protein 45(Rbm45)
GMDS	1.34	0.015	35.394	42.001	36.922	49.676	57.397	46.344	GDP-mannose 4, 6-dehydratase(Gmds)
WNT3	1.34	0.03	3.88	4.819	3.504	5.216	5.771	5.224	wingless-type MMTV integration site family, member 3(Wnt3)
CNFN.1.S	1.34	0.006	55.589	59.495	60.156	72.122	87.32	75.75	cornifelin, gene 1 S homeolog(cnfn.1.S)
STYX.L	1.34	0.005	9.53	9.547	8.502	11.869	13.434	11.601	serine/threonine/tyrosine interacting protein L homeolog(styx.L)
SNRPB2	1.34	0.032	30.461	29.557	29.152	40.003	47.003	33.256	U2 small nuclear ribonucleoprotein B(Snrpb2)
NDUFA6	1.34	0.031	43.59	42.21	42.616	64.266	61.912	46.926	NADH dehydrogenase [ubiquinone] 1 alpha subcomplex subunit 6(NDUFA6)
MINDY3	1.34	0.026	5.364	6.156	4.878	7.138	8.194	6.556	MINDY lysine 48 deubiquitinase 3(mindy3)
WDR77	1.33	0.029	7.431	8.6	7.255	10.615	11.719	8.866	WD repeat domain 77(WDR77)
LOC106584057	1.33	0.047	124.579	109.594	98.011	150.203	169.802	124.671	protein mago nashi homolog(LOC106584057)
ALG6	1.33	0.037	6.839	7.414	6.529	9.853	10.453	7.608	ALG6, alpha-1,3-glucosyltransferase(ALG6)
RAB27A	1.33	0.018	17.032	20.905	17.854	26.335	25.867	22.079	RAB27A, member RAS oncogene family(Rab27a)
MOB3A	1.33	0.03	26.153	28.137	29.547	33.086	44.418	34.97	MOB kinase activator 3A(Mob3a)
PEF1	1.33	0.031	68.385	81.4	72.916	88.18	116.218	93.385	penta-EF-hand domain containing 1(pef1)
PGK1	1.33	0.047	47.489	53.379	47.892	65.379	79.22	55.076	Phosphoglycerate kinase 1(PGK1)
SASS6	1.33	0.048	2.122	2.793	2.58	3.607	3.518	2.828	SAS-6 centriolar assembly protein(sass6)
TSR3	1.33	0.035	6.994	8.538	6.638	9.254	11.118	9.027	TSR3 20S rRNA accumulation(Tsr3)
MATK	1.33	0.039	5.07	5.194	4.503	5.506	7.642	6.601	megakaryocyte-associated tyrosine kinase(Matk)
CCDC97	1.33	0.016	7.823	7.745	8.084	9.901	12.221	9.479	coiled-coil domain containing 97(Ccdc97)
CFAP410	1.33	0.026	4.016	3.766	3.089	4.783	4.406	5.178	cilia and flagella associated protein 410(CFAP410)
HOXD9A	1.32	0.004	3.069	2.884	3.375	4.293	3.855	4.188	homeobox D9a(hoxd9a)
TMEM68	1.32	0.004	7.3	6.408	6.633	8.292	9.141	9.484	transmembrane protein 68(TMEM68)
JAGN1B	1.32	0.033	17.271	21.841	18.295	25.733	27.953	22.192	jagunal homolog 1b(jagn1b)
STX10	1.32	0.012	15.042	16.77	17.088	20.05	24.309	20.433	syntaxin 10(STX10)
MBD4	1.32	0.038	8.731	9.576	8.239	13.959	11.088	10.272	methyl-CpG binding domain protein 4(Mbd4)
EDF1.L	1.32	0.047	90.702	72.722	75.286	107.303	119.158	89.23	endothelial differentiation related factor 1 L homeolog(edf1.L)
NOL10	1.32	0.048	6.546	9.153	7.296	9.144	10.265	10.675	nucleolar protein 10(nol10)
CPNE2	1.32	0.01	5.154	5.053	5.208	5.897	7.223	7.266	copine II(Cpne2)
ATP5F1D	1.32	0.036	233.114	227.335	198.176	322.599	304.11	244.086	ATP synthase F1 subunit delta(ATP5F1D)
BYSL	1.32	0.022	29.978	36.361	31.805	42.859	47.811	38.477	bystin like(BYSL)
MTX1	1.31	0.012	10.209	9.766	9.565	12.896	14.595	11.492	metaxin-1-like(MTX1)
LOC109092553	1.31	0.012	69.045	65.09	70.278	97.925	93.272	78.423	acyl-CoA desaturase-like(LOC109092553)
PURH	1.31	0.021	17.296	21.292	21.551	25.755	28.375	24.616	bifunctional phosphoribosylaminoimidazolecarboxamide formyltransferase/IMP cyclohydrolase(purH)
PRPS1	1.31	0.044	58.179	67.959	58.486	73.842	96.473	73.289	phosphoribosyl pyrophosphate synthetase 1(Prps1)
1700123O20RIK	1.31	0.042	14.37	10.892	10.564	15.483	14.7	16.365	RIKEN cDNA 1700123O20 gene(1700123O20Rik)
CCNDBP1	1.31	0.033	14.865	15.417	12.442	19.698	20.048	16.228	cyclin D-type binding-protein 1(ccndbp1)
CDC26	1.31	0.029	18.388	21.55	19.24	28.767	26.812	22.171	cell division cycle 26 homolog(cdc26)
RPF2	1.31	0.032	22.353	25.469	26.241	31.749	37.204	28.33	ribosome production factor 2 homolog(RPF2)
AGGF1	1.31	0.016	13.72	13.242	12.657	17.117	19.599	15.258	angiogenic factor with G patch and FHA domains 1(Aggf1)
CCNYL1	1.3	0.008	11.488	10.037	10.15	13.77	14.823	12.709	cyclin Y-like 1(ccnyl1)
TIMM23A	1.3	0.049	36.519	44.222	37.203	50.887	59.314	44.037	translocase of inner mitochondrial membrane 23 homolog a (yeast)(timm23a)
RUVBL2	1.3	0.019	18.31	20.912	18.646	24.904	28.247	22.438	RuvB-like AAA ATPase 2(ruvbl2)
WDR54	1.3	0.011	1.281	1.067	1.079	1.391	1.528	1.533	WD repeat domain 54(Wdr54)
CHTOP	1.3	0.021	56.815	71.256	64.857	77.497	91.017	82.269	chromatin target of PRMT1(CHTOP)
WDR83	1.3	0.035	6.103	5.225	6.25	6.679	8.678	7.597	WD repeat domain containing 83(wdr83)
SRSF3	1.3	0.021	229.59	261.065	240.997	317.427	358.682	280.204	serine and arginine-rich splicing factor 3(Srsf3)
GPKOW	1.3	0.007	8.035	8.891	8.848	10.683	12.338	10.565	G patch domain and KOW motifs(gpkow)
ATP5F1A.L	1.3	0.026	400.432	495.196	447.959	580.055	644.585	523.276	ATP synthase F1 subunit alpha L homeolog(atp5f1a.L)
SPTLC3	1.3	0.037	5.214	6.572	6.563	7.196	8.729	7.876	serine palmitoyltransferase long chain base subunit 3(SPTLC3)
RBM48	1.3	0.016	2.571	2.251	2.357	3.404	2.757	3.187	RNA binding motif protein 48(rbm48)
ARL9	1.3	0.018	9.176	11.453	9.051	12.972	12.792	12.55	ADP ribosylation factor like GTPase 9(ARL9)
PSMG1	1.3	0.024	33.881	38.418	38.151	49.048	53.167	41.668	proteasome (prosome, macropain) assembly chaperone 1(psmg1)
COQ9	1.3	0.037	15.418	17.685	14.793	20.974	23.41	17.935	coenzyme Q9(Coq9)
ZNF705D	1.3	0.041	2.41	2.29	1.926	3.28	2.691	2.629	zinc finger protein 705D(ZNF705D)
RANGAP1.S	1.3	0.043	33.963	38.675	39.905	44.707	57.542	44.373	Ran GTPase activating protein 1 S homeolog(rangap1.S)
GRWD1	1.3	0.016	22.837	26.427	26.515	30.326	36.239	31.661	glutamate-rich WD repeat containing 1(Grwd1)
GALNT6	1.3	0.03	23.655	24.134	27.582	28.063	34.355	35.48	polypeptide N-acetylgalactosaminyltransferase 6(Galnt6)
SSRP1	1.29	0.042	12.683	17.564	14.698	18.77	20.189	18.754	structure specific recognition protein 1(SSRP1)
PNPLA3	1.29	0.015	5.844	6.267	7.201	7.767	8.793	8.308	patatin-like phospholipase domain containing 3(Pnpla3)
HSP90AA1.1	1.29	0.016	40.196	38.335	36.274	46.324	56.262	46.1	heat shock protein 90, alpha (cytosolic), class A member 1, tandem duplicate 1(hsp90aa1.1)
NOP14	1.29	0.048	75.785	76.066	78.304	95.122	119.549	85.187	NOP14 nucleolar protein(NOP14)
EIF5	1.29	0.022	138.243	148.028	137.935	167.888	211.554	170.345	eukaryotic translation initiation factor 5(Eif5)
NOP53	1.29	0.016	37.23	43.802	40.843	50.434	58.088	48.669	NOP53 ribosome biogenesis factor(Nop53)
PES	1.29	0.018	132.799	154.57	146.035	169.636	207.155	182.242	pescadillo(pes)
TAF10	1.29	0.024	15.526	16.377	16.627	23.263	21.595	17.928	TATA-box binding protein associated factor 10(TAF10)
OGFOD3	1.29	0.014	3.827	4.534	4.311	5.574	5.769	4.944	2-oxoglutarate and iron-dependent oxygenase domain containing 3(Ogfod3)
NSFL1C	1.29	0.048	37.901	44.498	37.36	48.016	60.199	46.332	NSFL1 cofactor(NSFL1C)
FRA10AC1	1.28	0.031	2.607	3.132	3.01	3.281	3.968	4.001	FRA10A associated CGG repeat 1(Fra10ac1)
EIF2A	1.28	0.036	8.804	9.341	8.363	11.85	12.753	9.631	eukaryotic translation initiation factor 2A(eif2a)
PSMD13	1.28	0.044	69.961	72.153	62.455	91.522	98.226	74.06	proteasome 26S subunit, non-ATPase 13(PSMD13)
SIRT7	1.28	0.008	2.693	2.902	2.651	3.864	3.49	3.244	sirtuin 7(Sirt7)
ARHGAP9	1.28	0.033	4.198	3.443	3.832	5.548	4.461	4.72	Rho GTPase activating protein 9(ARHGAP9)
SERP1	1.28	0.007	101.965	102.957	95.793	126.997	141.069	118.147	stress-associated endoplasmic reticulum protein 1(Serp1)
UQCC2	1.28	0.03	23.984	23.462	23.479	27.435	35.679	28.243	ubiquinol-cytochrome c reductase complex assembly factor 2(uqcc2)
LPAR3	1.28	0.025	27.135	32.552	31.08	34.443	40.987	40.643	lysophosphatidic acid receptor 3(Lpar3)
WDR55	1.28	0.047	10.836	12.071	12.683	16.95	15.912	12.837	WD repeat domain 55(wdr55)
CIAO1	1.28	0.028	10.921	12.424	11.011	14.032	16.72	13.278	cytosolic iron-sulfur assembly component 1(ciao1)
YRDC	1.27	0.041	20.582	18.834	17.507	23.359	27.881	21.482	yrdC domain containing (E.coli)(Yrdc)
TBCK	1.27	0.011	3.657	4.043	3.795	5.392	4.519	4.729	TBC1 domain containing kinase(TBCK)
PGAM1	1.27	0.006	35.486	35.65	33.769	45.517	47.619	40.347	phosphoglycerate mutase 1(PGAM1)
MPHOSPH10	1.27	0.04	32.591	32.16	29.837	33.989	41.711	45.123	M-phase phosphoprotein 10(MPHOSPH10)
BABAM2	1.27	0.009	12.577	13.086	13.034	18.252	15.748	15.204	BRISC and BRCA1 A complex member 2(babam2)
PDZRN3	1.27	0.032	4.444	5.243	5.487	5.906	7.035	6.263	PDZ domain containing ring finger 3(PDZRN3)
G3BP1	1.27	0.038	197.812	234.154	235.449	247.078	304.65	293.898	G3BP stress granule assembly factor 1(G3BP1)
TSR1.L	1.27	0.007	24.26	27.735	25.706	30.653	34.502	33.143	TSR1, ribosome maturation factor L homeolog(tsr1.L)
PCSK7	1.26	0.005	43.988	45.831	48.937	63.031	55.503	57.035	proprotein convertase subtilisin/kexin type 7(PCSK7)
STIP1	1.26	0.006	63.824	70.807	64.725	85.363	88.954	77.865	stress-induced phosphoprotein 1(Stip1)
HCCS	1.26	0.041	17.971	15.195	14.483	21.562	20.781	17.826	holocytochrome c synthase(HCCS)
FTT-2	1.26	0.03	659.02	657.299	532.003	782.9	820.318	724.346	14-3-3-like protein 2;14_3_3 domain-containing protein(ftt-2)
DNM1L	1.26	0.019	23.71	25.36	22.433	28.307	28.35	33.824	dynamin 1 like(DNM1L)
GTF3C1	1.26	0.035	17.942	17.531	14.547	22.398	19.003	21.603	general transcription factor IIIC subunit 1(GTF3C1)
METRNL.L	1.26	0.015	38.546	41.773	44.608	47.692	53.911	56.057	meteorin, glial cell differentiation regulator-like L homeolog(metrnl.L)
IGBP1	1.26	0.049	12.878	15.747	14.724	17.585	20.784	16.365	immunoglobulin binding protein 1(Igbp1)
CMSS1	1.26	0.017	8.479	8.054	7.01	9.943	10.392	9.262	cms1 ribosomal small subunit homolog(cmss1)
RAC2	1.26	0.032	16.949	18.927	15.831	20.799	24.337	19.986	Rac family small GTPase 2(RAC2)
SDF2L1	1.26	0.038	28.989	30.951	33.863	42.067	42.116	34.08	stromal cell derived factor 2 like 1(SDF2L1)
PSMB5	1.26	0.031	56.365	60.393	53.724	81.023	70.708	63.427	proteasome (prosome, macropain) subunit, beta type 5(Psmb5)
SBDS	1.26	0.022	12.91	13.846	12.716	17.566	17.731	14.499	SBDS ribosome assembly guanine nucleotide exchange factor(sbds)
GTF2B	1.26	0.031	46.74	59.024	51.797	70.862	64.439	62.086	general transcription factor IIB(Gtf2b)
RAB13	1.26	0.041	66.298	64.178	56.614	83.505	84.214	67.872	RAB13, member RAS oncogene family(rab13)
FAM241A	1.26	0.04	9.616	9.975	10.854	10.937	13.966	13.482	family with sequence similarity 241, member A(Fam241a)
PRPF38B	1.25	0.048	14.643	17.634	19.229	20.439	20.709	23.074	pre-mRNA processing factor 38B(prpf38b)
DTX3	1.25	0.009	5.774	5.705	5.189	6.817	6.535	7.535	deltex E3 ubiquitin ligase 3(DTX3)
LNX2	1.25	0.015	22.616	27.054	23.175	31.295	28.705	30.991	ligand of numb-protein X 2(LNX2)
RINT1	1.25	0.001	4.245	4.306	4.251	5.5	5.12	5.415	RAD50 interactor 1(RINT1)
KLHL8	1.25	0.01	28.071	24.664	28.817	35.782	33.672	32.471	kelch-like 8(Klhl8)
GCA	1.25	0.023	41.559	39.269	38.671	49.702	55.945	44.467	grancalcin(Gca)
PRELID3B	1.25	0.015	28.393	29.53	28.573	32.099	39.411	37.084	PRELI domain containing 3B(PRELID3B)
CWC27	1.25	0.011	4.978	4.889	5.231	6.851	6.382	5.698	CWC27 spliceosome associated cyclophilin(cwc27)
ATP1A1	1.25	0.043	235.61	284.874	239.496	292.963	354.842	302.065	ATPase Na+/K+ transporting subunit alpha 1(ATP1A1)
TBCC	1.25	0.005	8.367	7.803	8.318	9.419	10.813	10.372	tubulin folding cofactor C(TBCC)
GLRX	1.25	0.038	52.482	58.222	58.027	67.137	80.773	63.412	glutaredoxin(Glrx)
RRP9	1.25	0.045	15.864	17.939	14.843	21.167	21.745	17.742	ribosomal RNA processing 9, U3 small nucleolar RNA binding protein(RRP9)
CNOT8	1.24	0.034	12.965	13.954	11.582	15.935	17.462	14.468	CCR4-NOT transcription complex subunit 8(CNOT8)
PLK2	1.24	0.017	27.514	30.26	31.626	34.982	35.619	40.482	polo like kinase 2(PLK2)
SI:CH73-52E5.2	1.24	0.017	5.018	4.843	5.275	6.555	6.697	5.586	si:ch73-52e5.2(si:ch73-52e5.2)
LLGL2	1.24	0.049	43.567	51.804	43.298	50.593	62.03	59.503	LLGL scribble cell polarity complex component 2(llgl2)
HOMER2	1.24	0.025	32.057	37.627	30.857	44.255	39.83	40.264	homer scaffold protein 2(Homer2)
MTOR	1.24	0.009	13.448	13.3	13.756	15.166	17.962	17.195	mechanistic target of rapamycin kinase(MTOR)
AIFM3	1.24	0.011	9.982	9.174	9.865	12.136	12.925	10.959	apoptosis-inducing factor, mitochondrion-associated 3(Aifm3)
LCLAT1	1.24	0.03	9.946	10.679	10.751	12.816	14.633	11.571	lysocardiolipin acyltransferase 1(lclat1)
EED	1.24	0.02	18.229	20.938	18.113	24.614	24.619	21.612	embryonic ectoderm development(eed)
KLHL3	1.24	0.037	3.283	3.545	3.308	3.693	4.152	4.754	kelch-like family member 3(klhl3)
PCID2	1.24	0.03	10.597	11.395	10.88	14.31	14.697	11.805	PCI domain containing 2(pcid2)
BICDL1	1.24	0.036	5.459	5.715	6.884	7.417	7.765	7.046	BICD family like cargo adaptor 1(Bicdl1)
PDAP1	1.24	0.024	25.399	21.385	21.513	27.755	30.031	26.447	PDGFA associated protein 1(PDAP1)
SRSF7	1.23	0.042	48.516	63.228	57.983	71.489	68.705	68.164	serine and arginine rich splicing factor 7(SRSF7)
C24G6.8	1.23	0.041	28.853	32.492	29.464	36.713	42.408	33.339	putative peptidyl-tRNA hydrolase 2(C24G6.8)
INSIG2	1.23	0.019	20.35	20.662	19.763	27.497	25.4	22.313	insulin induced gene 2(INSIG2)
NOC2L	1.23	0.049	20.594	22.711	19.746	22.656	28.997	26.253	NOC2 like nucleolar associated transcriptional repressor(NOC2L)
FUT11	1.23	0.022	6.354	5.508	5.206	6.935	6.722	7.279	fucosyltransferase 11 (alpha (1,3) fucosyltransferase)(fut11)
NARS1	1.23	0.039	116.433	139.46	117.528	145.482	167.991	144.982	asparaginyl-tRNA synthetase 1(NARS1)
ZNHIT3	1.23	0.018	9.05	8.937	8.416	11.137	11.676	9.712	zinc finger HIT-type containing 3(ZNHIT3)
ALG14	1.23	0.026	6.036	6.739	5.414	7.673	7.443	7.126	ALG14 UDP-N-acetylglucosaminyltransferase subunit(ALG14)
HSD17B7	1.23	0.019	0.797	0.627	0.399	1.099	1.352	1.243	hydroxysteroid 17-beta dehydrogenase 7(HSD17B7)
LDHA	1.23	0.003	40.616	40.377	39.733	47.714	52.988	47.575	lactate dehydrogenase A4(ldha)
LSM5	1.23	0.028	26.334	23.065	25.337	27.529	33.199	31.051	LSM5 homolog, U6 small nuclear RNA and mRNA degradation associated(LSM5)
SELENOF	1.23	0.036	191.858	192.894	169.474	228.529	249.22	203.038	selenoprotein F(selenof)
TXLNA	1.22	0.048	14.262	17.683	14.173	17.59	19.664	18.974	taxilin alpha(TXLNA)
ZNF511	1.22	0.039	2.903	2.638	2.652	3.45	3.684	2.934	zinc finger protein 511(znf511)
AP3M1	1.22	0.029	6.493	7.768	6.681	8.355	9.164	8.066	adaptor related protein complex 3 mu 1 subunit(AP3M1)
BAIAP2L1	1.22	0.02	36.234	37.262	39.917	41.764	47.21	49.975	BAI1-associated protein 2-like 1(Baiap2l1)
CHCHD2	1.22	0.042	97.194	100.781	99.155	120.453	138.044	106.564	coiled-coil-helix-coiled-coil-helix domain containing 2(CHCHD2)
SMARCA5	1.22	0.014	63.791	73.53	73.224	82.088	90.197	84.621	SWI/SNF related, matrix associated, actin dependent regulator of chromatin, subfamily a, member 5(SMARCA5)
INTS15	1.22	0.009	12.251	13.001	12.403	14.253	15.182	16.615	integrator complex subunit 15(ints15)
CCT6A	1.22	0.021	125.279	130.792	134.765	155.556	177.032	145.847	chaperonin containing TCP1 subunit 6A(CCT6A)
HNRNPD	1.22	0.049	25.173	29.413	28.302	35.682	35.929	29.645	heterogeneous nuclear ribonucleoprotein D(Hnrnpd)
AKIRIN1	1.22	0.007	11.64	11.424	13.015	14.352	15.096	14.477	akirin 1(akirin1)
PGD	1.22	0.001	120.129	127.242	116.828	149.628	145	148.832	phosphogluconate dehydrogenase(PGD)
CDV3	1.22	0.024	38.339	43.498	37.227	44.913	48.433	51.546	carnitine deficiency-associated gene expressed in ventricle 3(cdv3)
DCUN1D3	1.22	0.026	9.815	9.803	11.234	12.623	11.516	13.428	defective in cullin neddylation 1 domain containing 3(Dcun1d3)
ALDOCB	1.22	0.001	84.129	87.719	83.72	104.467	104.846	101.823	aldolase C, fructose-bisphosphate, b(aldocb)
PSMB6L-B	1.22	0.007	56.871	56.224	49.945	65.43	67.685	64.871	Proteasome subunit beta type-6-B like protein(psmb6l-b)
RTN4	1.22	0.017	41.067	46.625	47.405	54.16	58.101	51.867	reticulon 4(Rtn4)
AKR7A2	1.22	0.02	19.935	20.014	19.764	23.409	27.108	22.336	aldo-keto reductase family 7 member A2(AKR7A2)
TP53RK	1.22	0.024	7.721	9.318	8.85	10.625	10.822	9.95	TP53 regulating kinase(TP53RK)
EMC3	1.21	0.004	33.923	34.232	31.206	40.335	41.635	38.496	ER membrane protein complex subunit 3(Emc3)
NOP56	1.21	0.049	69.805	75.739	78.159	84.315	103.422	84.264	NOP56 ribonucleoprotein(NOP56)
SLC35E2	1.21	0.005	29.813	29.58	28.805	37.077	36.707	33.028	solute carrier family 35, member E2(Slc35e2)
HSPA8	1.21	0.038	1057.8	1226.82	1113.72	1311.3	1521.6	1280.49	heat shock protein family A (Hsp70) member 8(Hspa8)
PTGDR2	1.21	0.027	0.469	0.699	1.046	1.116	1.207	1.372	prostaglandin D2 receptor 2(Ptgdr2)
LSM12B	1.21	0.042	68.917	70.472	63.627	85.047	88.882	72.082	LSM12 homolog b(lsm12b)
PLRG1	1.21	0.049	19.63	24.552	19.803	24.918	26.029	25.887	pleiotropic regulator 1(PLRG1)
IPO11	1.21	0.045	3.382	3.996	3.677	4.143	4.926	4.261	importin 11(Ipo11)
GIPC1	1.2	0.018	22.509	23.309	24.074	25.359	29.424	29.548	GIPC PDZ domain containing family member 1(GIPC1)
UFM1	1.2	0.028	11.612	11.59	12.001	15.247	14.739	12.539	ubiquitin-fold modifier 1(ufm1)
NPC2.1	1.2	0.038	132.914	128.753	130.082	151.605	178.987	143.131	NPC intracellular cholesterol transporter 2, tandem duplicate 1(npc2.1)
MED30	1.2	0.021	9.548	9.53	8.703	12.118	10.294	11.039	mediator complex subunit 30(med30)
COPS8	1.2	0.036	10.145	8.798	8.863	10.339	12.139	10.953	COP9 signalosome subunit 8(cops8)
DDA1	1.2	0.006	10.056	9.871	9.221	12.335	11.593	11.113	DET1 and DDB1 associated 1(dda1)
